# Supplementary material for: ‘The response is like a big ship’: community feedback as a case study of evidence uptake and use in the 2018–2020 Ebola epidemic in the Democratic Republic of the Congo
Source: PubMed Central journal article supplement — BMJ Glob Health. 2022 Feb 23;7(2):e005971. doi: 10.1136/bmjgh-2021-005971 (PMC8867249; doi:10.1136/bmjgh-2021-005971), 2022-02-23
Supplement: bmjgh-2021-005971supp001.pdf [file bmjgh-2021-005971supp001.pdf]

**APPENDIX A: COORDINATION MEETINGS ATTENDED AND DOCUMENTS REVIEWED**

| <b>Coordination Meeting</b>                         | <b>Coordination Level</b>     |
|-----------------------------------------------------|-------------------------------|
|                                                     |                               |
| Community Feedback                                  | Sub-Coordination Level – Beni |
| Risk Communications & Community Engagement Partners | Operational Level – Beni      |
| Risk Communications & Community Engagement Partners | Strategic Level – Goma        |
| General Coordination                                | Strategic Level – Goma        |
| UN Communications Coordination                      | Strategic Level – Goma        |
| Community Feedback                                  | Operational Level – Goma      |
| Internal Red Cross Community Feedback               | Sub-Coordination Level – Goma |

| <b>Document</b>                                                                                                                                    | <b>Author</b>                                                                                                                                                            | <b>Version or Date</b> |
|----------------------------------------------------------------------------------------------------------------------------------------------------|--------------------------------------------------------------------------------------------------------------------------------------------------------------------------|------------------------|
|                                                                                                                                                    |                                                                                                                                                                          |                        |
| Strategic Response Plan 3: February – July 2019 For the Ebola Virus Disease Outbreak in the Provinces of North Kivu and Ituri                      | DRC MOH                                                                                                                                                                  | 13 Feb 2019            |
| Strategic Response Plan 4: July – December 2019 For the Ebola Virus Disease Outbreak in the Provinces of North Kivu and Ituri                      | DRC MOH                                                                                                                                                                  | 9 August 2019          |
| Safe and Dignified Burial: An Implementation Guide for Field Managers                                                                              | International Federation of the Red Cross                                                                                                                                | Version 4              |
| Risk Communication and Community Engagement Preparedness and Readiness Framework: Ebola Response in the Democratic Republic of Congo in North Kivu | Risk Communications & Community Engagement Incident Management Team for the DRC Ebola outbreak response (WHO, UNICEF, IFRC, GOARN Research, US CDC, SSHAP, Anthrologica) | September 2018         |
| Red Cross CF Mechanism in DRC: Guidance on how to collect and use Community Feedback during an Ebola operation                                     | IFRC                                                                                                                                                                     | 29 May 2019            |
| Community Feedback Infographic                                                                                                                     | IFRC                                                                                                                                                                     | 2019                   |

|                                                                                  |                      |               |
|----------------------------------------------------------------------------------|----------------------|---------------|
| Annexe des 25 Questions:<br>Questions & Réponses Sur Les<br>Vaccins Contre Ebola | IFRC & RCCE Pillar   | November 2019 |
| Enterrements Communautaires<br>d'Urgence a Moindre Risque<br>(ECUMR)             | IFRC & DRC Red Cross | November 2018 |

## APPENDIX B: INTERVIEWEES

### Key Informant Interviews

\*Note that organisations and profiles of interviewees have been left deliberately vague to ensure anonymity of research participants

| Type of Organisation              | Profile of Interviewee                                 | Number of Interviewees |
|-----------------------------------|--------------------------------------------------------|------------------------|
| Response Technical Commission     | Risk Communications & Community Engagement Specialist  | 4                      |
| Response Technical Commission     | Case Management Specialist                             | 1                      |
| Response Technical Commission     | Social Science Specialist                              | 1                      |
| Response Technical Commission     | Monitoring and Evaluation Specialist                   | 1                      |
| Response Technical Commission     | Infection Prevention and Control Specialist            | 3                      |
| Response Technical Commission     | Epidemiologist                                         | 1                      |
| UN Agency                         | Area Coordinator                                       | 1                      |
| UN Agency                         | Programme Coordinator                                  | 1                      |
| UN Agency                         | Communications Specialist                              | 2                      |
| National Humanitarian Agency      | Risk Communications & Community Engagement Coordinator | 1                      |
| National Humanitarian Agency      | Safe and Dignified Burials Manager                     | 1                      |
| National Humanitarian Agency      | Programme Coordinator                                  | 1                      |
| National Humanitarian Agency      | Information Management Manager                         | 1                      |
| International Humanitarian Agency | Community Engagement Specialist                        | 2                      |
| International Humanitarian Agency | Safe and Dignified Burials Coordinator                 | 1                      |
| International Humanitarian Agency | Infection Prevention and Control Coordinator           | 1                      |
| Technical Assistance Body         | Technical Advisor                                      | 2                      |
| Funding Body                      | Technical Advisor                                      | 1                      |
| International NGO                 | Communications Expert                                  | 1                      |
| International NGO                 | Public Health Coordinator                              | 1                      |
| International NGO                 | Programme Manager                                      | 1                      |
| International NGO                 | Risk Communications & Community Engagement Coordinator | 1                      |

### Focus Group Discussions with Red Cross staff

| Technical Area of Interviewees          | Location | Number of Participants |
|-----------------------------------------|----------|------------------------|
| Community Engagement and Accountability | Goma     | 18                     |
| Safe and Dignified Burial               | Beni     | 7 (over two FGDs)      |

## APPENDIX C: INTERVIEW TOPIC GUIDE

\*Note that this guide iterated over time.

| Question                                                                                                                                                                                    | Probe                                                                                                                                                                                                                                                                                                                                                                                                                                                                                                                                               |
|---------------------------------------------------------------------------------------------------------------------------------------------------------------------------------------------|-----------------------------------------------------------------------------------------------------------------------------------------------------------------------------------------------------------------------------------------------------------------------------------------------------------------------------------------------------------------------------------------------------------------------------------------------------------------------------------------------------------------------------------------------------|
| <i>For all respondents</i>                                                                                                                                                                  |                                                                                                                                                                                                                                                                                                                                                                                                                                                                                                                                                     |
| Please can you start by telling us a little about your role within the North Kivu Ebola response                                                                                            | <p>What does your organisation do?</p> <p>Which response pillars does your organization support? In what ways? With what activities?</p>                                                                                                                                                                                                                                                                                                                                                                                                            |
| What is your role within that organisation/those activities?                                                                                                                                | Has your role changed over time? In what ways?                                                                                                                                                                                                                                                                                                                                                                                                                                                                                                      |
| Please can you tell us a little about strategic/policy decision making processes within the N. Kivu response? (please feel free to provide an example from a specific pillar or initiative) | <p>Who/which organisations are involved in decisions relating to changes of protocols or other policy guidance?</p> <p>At which level of the response are those decisions taken?<br/>At which level of the response are those decisions implemented?</p> <p>What factors play into the way that decisions are made in this response? (political/social/economic/coordination structures etc)</p> <p>Are changes in policy or protocol communicated to other decision makers or organisations involved in coordination and decision-making? How?</p> |
| What is considered 'evidence' in this response?                                                                                                                                             | <p>Where does the evidence for strategic or policy decision making come from?</p> <p>Who produces it?</p> <p>Are some forms of evidence used or valued more than others and why? What factors play into the decision to use some evidence vs. others?</p> <p>Is the quality of the evidence used or considered assessed; if so, how?</p>                                                                                                                                                                                                            |
| How does evidence – epidemiological or otherwise – inform decision making?                                                                                                                  | <p>Who is responsible for ensuring that new information or analytical work is communicated to decision-makers?</p> <p>Are there routine channels for communicating new evidence from the response to decision-makers?</p>                                                                                                                                                                                                                                                                                                                           |

|                                                                                                                    |                                                                                                                                                                                                                                                                                                                                                                                                                                          |
|--------------------------------------------------------------------------------------------------------------------|------------------------------------------------------------------------------------------------------------------------------------------------------------------------------------------------------------------------------------------------------------------------------------------------------------------------------------------------------------------------------------------------------------------------------------------|
|                                                                                                                    | <p>Are these effective? Why/why not?</p> <p>How does that process work in practice? What's the information flow?</p> <p>Is uptake of evidence affected by who produced it? How? In what ways?</p>                                                                                                                                                                                                                                        |
| What challenges exist to improving response decision-making processes?                                             | <p>How fast are decisions made? How long between making a decision and changing a policy/approach/strategy?</p> <p>Speed of decision-making?</p> <p>Location of decision-making (e.g. different coordination levels)?</p> <p>Information management/flow of evidence to inform decisions?</p> <p>Institutional/information management/political/complexity of response – probe as to what exactly and how those challenges play out.</p> |
| What are the processes for cascading decisions down to the implementation level?                                   | <p>How are policy changes communicated to implementing organisations or staff?</p> <p>How well does this process work?</p> <p>What are the specific challenges with reducing that policy/practice gap?</p>                                                                                                                                                                                                                               |
| What do you know about IFRC's CF mechanism?                                                                        | <p>How does it work?</p> <p>How does it compare to other feedback mechanisms?</p> <p>What are its strengths and weaknesses?</p>                                                                                                                                                                                                                                                                                                          |
| How is the information from the CF system integrated into response decision-making/strategy development?           | <p>Is it similar or different to the other evidence uptake processes we discussed earlier? In what ways?</p> <p><i>(If different)</i> Why do you think this is?</p>                                                                                                                                                                                                                                                                      |
| What are the barriers for improving the integration of the CF mechanism (into Ebola coordination/decision-making)? | <p>What opportunities are there to improve that integration?</p>                                                                                                                                                                                                                                                                                                                                                                         |
| Can you give me an example of how the CF has successfully been used to change a                                    | <p>How did that work?</p> <p>Why was it successful?</p>                                                                                                                                                                                                                                                                                                                                                                                  |

|                                                                                                                                           |                                                                                                                                                                                                                  |
|-------------------------------------------------------------------------------------------------------------------------------------------|------------------------------------------------------------------------------------------------------------------------------------------------------------------------------------------------------------------|
| policy/protocol/strategy/approach?                                                                                                        |                                                                                                                                                                                                                  |
| Can you give me an example of a time where CF was available but it was <b>not</b> incorporated into strategy development/decision-making? | <p>Why was it not considered?</p> <p>What are the challenges with making that policy/practice change?</p> <p>What could be done differently?</p>                                                                 |
| How would decisions relating to this example/event have differed if the CF information had been available/been known about?               | Use negative event example/timeline to prompt respondents                                                                                                                                                        |
| What recommendations would you give to ensure that CF is better integrated into response strategy and decision-making?                    | <p>Different ways of presenting the information/wider reach for the feedback data/clearer recommendations/different engagement with decision-makers?</p> <p>How? In what ways? Why?</p>                          |
| <i>For respondents associated with the SDB or RCCE pillars</i>                                                                            |                                                                                                                                                                                                                  |
| Tell us about the SDB or comms pillar. How does it work?                                                                                  | <p>What is its role/remit within the wider response?</p> <p>Who are the organisations or critical individuals involved?</p> <p>Who typically makes decisions within/for the SDB/RCCE pillar?</p>                 |
| What are the processes for changing SDB or risk comms SOPs?                                                                               | <p>What information is used to make changes?</p> <p>Who produces that information? How does it communicated to the SDB pillar/pillar leads?</p>                                                                  |
| In your opinion, does the SDB pillar have information needs that have been/are currently unmet?                                           | <p>What are these?</p> <p>Are there ways you can see that could resolve these information needs? Who would need to be involved in resolving this?</p>                                                            |
| How is the information from the IFRC's CF mechanism (or other feedback mechanisms) integrated into SDB strategies and protocols?          | <p>What are the barriers/challenges in this process?</p> <p>What are the opportunities?</p>                                                                                                                      |
| Tell me about the linkages between CF and SDB strategy and approaches.                                                                    | <p>How has CF data fed into SDB decision making?</p> <p>What specific changes have you seen in SDB approaches/strategy relating to CF information?</p> <p>What hasn't changed yet based on this information?</p> |

|  |                                     |
|--|-------------------------------------|
|  | What may be blocking these changes? |
|--|-------------------------------------|

**APPENDIX D: FOCUS GROUP TOPIC GUIDES**

\*Note that this guide iterated over time.

| Question                                                                                             | Probes                                                                                                                                                                                                                                                                                                                                                                                                                                                             |
|------------------------------------------------------------------------------------------------------|--------------------------------------------------------------------------------------------------------------------------------------------------------------------------------------------------------------------------------------------------------------------------------------------------------------------------------------------------------------------------------------------------------------------------------------------------------------------|
| (Around the table) Tell us about your role in the Ebola Response                                     |                                                                                                                                                                                                                                                                                                                                                                                                                                                                    |
| How does the CF information collection system work?                                                  | <p>Can you draw it out for us?</p> <p>Tell us how you record CF – count number of times etc.</p> <p>How do you decide what to record?</p> <p>How do you decide who to talk to for the feedback? Are there particular groups that are more/less likely to talk to you? Which ones?</p> <p>What changes to the system have taken place since you started working in this area?</p> <p>Why were these changes made?</p> <p>Are they positive or negative and why?</p> |
| Do you get information about what other communities have told your colleagues through the CF system? | <p>(if yes) how do you use this information?</p> <p>(if no) would you like to receive this information? How would it help you? What would you do with it?</p>                                                                                                                                                                                                                                                                                                      |
| Tell us about the challenges that you encounter collecting this information?                         | Prompt re. people's willingness to talk, security issues, language etc                                                                                                                                                                                                                                                                                                                                                                                             |
| After the information is collected, what happens?                                                    | <p>If there is a clear recommendation for change (from the community) as regards the Ebola Response strategy or approach does the change take place?</p> <p>If yes, how? If no, why not?</p>                                                                                                                                                                                                                                                                       |
| If a change based on CF has been recommended and no change is made what happens?                     | <p>How does the community feel about this?</p> <p>How does this affect you and your work?</p>                                                                                                                                                                                                                                                                                                                                                                      |
| How could the feedback mechanism work better?                                                        | <p>For you?</p> <p>For the community?</p>                                                                                                                                                                                                                                                                                                                                                                                                                          |



|  |                                                                               |
|--|-------------------------------------------------------------------------------|
|  | For other Ebola response workers?<br><br>What recommendations would you make? |
|--|-------------------------------------------------------------------------------|

| <i>For respondents associated with the SDB or RCCE pillars</i>                                                                   |                                                                                                                                                                                                                                                      |
|----------------------------------------------------------------------------------------------------------------------------------|------------------------------------------------------------------------------------------------------------------------------------------------------------------------------------------------------------------------------------------------------|
| Tell us about the SDB or comms pillar. How does it work?                                                                         | What is its role/remit within the wider response?<br><br>Who are the organisations or critical individuals involved?<br><br>Who typically makes decisions within/for the SDB/RCCE pillar?                                                            |
| What are the processes for changing SDB or risk comms SOPs?                                                                      | What information is used to make changes?<br><br>Who produces that information? How does it communicated to the SDB pillar/pillar leads?                                                                                                             |
| In your opinion, does the SDB pillar have information needs that have been/are currently unmet?                                  | What are these?<br><br>Are there ways you can see that could resolve these information needs? Who would need to be involved in resolving this?                                                                                                       |
| How is the information from the IFRC's CF mechanism (or other feedback mechanisms) integrated into SDB strategies and protocols? | What are the barriers/challenges in this process?<br><br>What are the opportunities?                                                                                                                                                                 |
| Tell me about the linkages between CF and SDB strategy and approaches.                                                           | How has CF data fed into SDB decision making?<br><br>What specific changes have you seen in SDB approaches/strategy relating to CF information?<br><br>What hasn't changed yet based on this information?<br><br>What may be blocking these changes? |
